# Supplementary material
Source: publisher figshare collection journal article supplement (https://gsajournals.figshare.com/ndownloader/files/25320704)
Supplement: Supplementary file 1 [file 25320704]

## Sheet: AllGAL4_Circ_change
Table S3. Genes causing a CHANGE in circulating HmlD-DsRed expression when disrupted by RNAi
#	Numeric ID	Library	Annotation Symbol	Gene Symbol	Gene Name	GAL4 Driver
1	8269	GD	CG5123	hid	head involution defective	Antp
2	28513	VALIUM10	CG18102	shi	shibire	Antp
3	28866	GD	CG8432	Rep	Rab escort protein	Antp
4	32415	VALIUM20	CG9750	rept	reptin	Antp
5	32865	VALIUM20	CG5519	Prp19	Pre-RNA processing factor 19	Antp
6	32879	VALIUM20	CG8309	eIF3m	eukaryotic translation initiation factor 3 subunit m	Antp
7	33043	VALIUM20	CG9193	PCNA	Proliferating cell nuclear antigen	Antp
8	33727	VALIUM20	CG6671	AGO1	Argonaute-1	Antp
9	34840	VALIUM20	CG16941	Sf3a1	Splicing factor 3a subunit 1	Antp
10	34865	VALIUM20	CG7008	Tudor-SN	Tudor staphylococcal nuclease	Antp
11	39335	GD	CG3193	crn	crooked neck	Antp
12	45027	GD	CG5605	eRF1	eukaryotic translation release factor 1	Antp
13	109782	KK	CG10840	eIF5B	eukaryotic translation initiation factor 5B	Antp
1	7185	NIG	CG7185	Cpsf6	Cleavage and polyadenylation specific factor 6	dome
2	11152	GD	CG5505	scny	scrawny	dome
3	23666	GD	CG9012	Chca	Clathrin heavy chain	dome
4	27322	VALIUM10	CG6056	AP-2sigma	Adaptor Protein complex 2, sigma subunit	dome
5	28513	VALIUM10	CG18102	shi	shibire	dome
6	31625	VALIUM1	CG6779	RpS3	Ribosomal protein S3	dome
7	32365	VALIUM20	CG1250	Sec23	Secretory 23	dome
8	33642	VALIUM20	CG1560	mys	myospheroid	dome
9	34335	VALIUM20	CG3539	Slh	SLY-1 homologous	dome
10	34626	VALIUM20	CG1101	Ref1	RNA and export factor binding protein 1	dome
11	34860	VALIUM20	CG11920	CG11920	-	dome
12	39335	GD	CG3193	crn	crooked neck	dome
13	101513	KK	CG3186	eEF5	eukaryotic translation elongation factor 5	dome
14	102406	KK	CG2216	Fer1HCH	Ferritin 1 heavy chain homologue	dome
15	103383	KK	CG9012	Chc	Clathrin heavy chain	dome
16	106240	KK	CG6382	eRF3	eukaryotic translation release factor 3	dome
17	107264	KK	CG5081	Syx7	Syntaxin 7	dome
1	3065	GD	CG10446	Sidpn	similar to Deadpan	Hml
2	3798	GD	CG18102	shi	shibire	Hml
3	7185	NIG	CG7185	Cpsf6	Cleavage and polyadenylation specific factor 6	Hml
4	15565	GD	CG4260	AP-2alpha	Adaptor Protein complex 2, alpha subunit	Hml
5	23666	GD	CG9012	Chc	Clathrin heavy chain	Hml
6	25950	VALIUM10	CG11556	Rph	Rabphilin	Hml
7	27530	VALIUM10	CG9012	Chc	Clathrin heavy chain	Hml
8	27820	GD	CG7057	AP-2mu	Adaptor Protein complex 2, mu subunit	Hml
9	28929	VALIUM10	CG15811	Rop	Ras opposite	Hml
10	29535	VALIUM10	CG3193	crn	crooked neck	Hml
11	29575	GD	CG1957	Cpsf100	Cleavage and polyadenylation specificity factor 100	Hml
12	30518	VALIUM10	CG3664	Rab5	Rab5	Hml
13	31893	VALIUM10	CG7178	wupA	wings up A	Hml
14	32854	VALIUM20	CG5374	CCT1	Chaperonin containing TCP1 subunit 1	Hml
15	32972	VALIUM20	CG13745	FANCI	Fanconi anemia complementation group I	Hml
16	33662	VALIUM20	CG18174	Rpn11	Regulatory particle non-ATPase 11	Hml
17	34335	VALIUM20	CG3539	Slh	SLY-1 homologous	Hml
18	34356	VALIUM20	CG5706	beta-PheRS	Phenylalanyl-tRNA synthetase, beta-subunit	Hml
19	34582	VALIUM20	CG3762	Vha68-2	Vacuolar H[+] ATPase 68 kDa subunit 2	Hml
20	34711	GD	CG3806	eIF2Bepsilon	eukaryotic translation initiation factor 2B subunit epsilon	Hml
21	34730	VALIUM20	CG2051	Hat1	Histone acetyltransferase 1	Hml
22	34836	VALIUM20	CG4264	Hsc70-4	Heat shock protein cognate 4	Hml
23	34840	VALIUM20	CG16941	Sf3a1	Splicing factor 3a subunit 1	Hml
24	34857	VALIUM20	CG10333	CG10333	-	Hml
25	35804	VALIUM22	CG9191	Klp61F	Kinesin-like protein at 61F	Hml
26	40865	VALIUM20	CG5505	scny	scrawny	Hml
27	101404	KK	CG44436	sno	strawberry notch	Hml
28	101513	KK	CG3186	eEF5	eukaryotic translation elongation factor 5	Hml
29	103205	KK	CG1322	zfh1	Zn finger homeodomain 1	Hml
30	103383	KK	CG9012	Chc	Clathrin heavy chain	Hml
31	104096	KK	CG14230	CG14230	-	Hml
32	104210	KK	CG7000	Snmp1	Sensory neuron membrane protein 1	Hml
33	104446	KK	CG7660	Pxt	Peroxinectin-like	Hml
34	105653	KK	CG2095	Sec8	Secretory 8	Hml
35	106144	KK	CG6094	CG6094	-	Hml
36	107264	KK	CG5081	Syx7	Syntaxin 7	Hml
37	109782	KK	CG10840	eIF5B	eukaryotic translation initiation factor 5B	Hml
38	110355	KK	CG7831	ncd	non-claret disjunctional	Hml
	a Genes in bold identified more than once by the same GAL4 driver.
